# Supplementary material for: Quantifying Collective Attention from Tweet Stream
Source: PLOS journal article supplement (doi:10.1371/journal.pone.0061823), 2013-04-30
Supplement: S3 (10.1371/journal.pone.0061823.s003) [file journal.pone.0061823.s003]

$$JS(P,Q) = 0.016$$

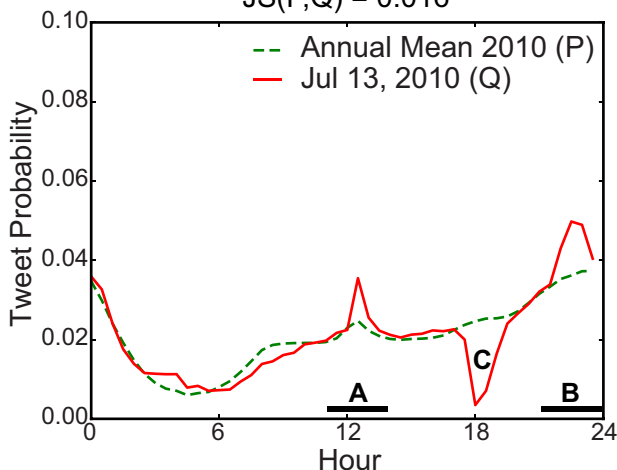

A

|    | Popularity                                                               | tf     | Popularity Enhancement                              | tf / tf <sub>before</sub> |
|----|--------------------------------------------------------------------------|--------|-----------------------------------------------------|---------------------------|
| 1  | http (used for URLs)                                                     | 0.0287 | 地震 (earthquake)                                     | 122                       |
| 2  | こと (a subpart of terms)                                                  | 0.0098 | 福島 (Fukushima, the earthquake center)               | 17                        |
| 3  | さん (Mr. or Ms.)                                                          | 0.0094 | 弟子 (pupil)                                          | 16                        |
| 4  | 地震 (earthquake)                                                          | 0.0093 | 目線 (eye line)                                       | 11                        |
| 5  | 今日 (today)                                                               | 0.0081 | Hayabusa (a Japanese space craft)                   | 8                         |
| 6  | twitpic (hashtag for Twitpic, a website for sharing pictures and videos) | 0.0065 | 速報 (flash report)                                   | 8                         |
| 7  | そう (a subpart of terms)                                                  | 0.0051 | 日曜日 (Sunday)                                        | 8                         |
| 8  | よう (a subpart of terms)                                                  | 0.0050 | 気象庁 (the Meteorological Agency)                     | 7                         |
| 9  | 自分 (myself)                                                              | 0.0035 | 四国 (Shikoku, one of the four main islands of Japan) | 7                         |
| 10 | これ (this)                                                                | 0.0033 | kenta (a person's name)                             | 6                         |

B

|    | Popularity                                                                            | tf     | Popularity Enhancement                                                   | tf / tf <sub>before</sub> |
|----|---------------------------------------------------------------------------------------|--------|--------------------------------------------------------------------------|---------------------------|
| 1  | http (used for URLs)                                                                  | 0.0340 | iOgd (a part of Ustream URL where Hyabusa's return was live broadcasted) | 223                       |
| 2  | live                                                                                  | 0.0156 | universe                                                                 | 169                       |
| 3  | こと (a subpart of terms)                                                               | 0.0108 | Hayabusa                                                                 | 43                        |
| 4  | さん (Mr. or Ms.)                                                                       | 0.0088 | 安藤 (Ando, an ice skater's name, Miki Ando)                               | 41                        |
| 5  | ustre (a broken part of Ustream, a website for live video streaming of events online) | 0.0087 | ハヤブサ (Hayabusa)                                                          | 39                        |
| 6  | universe                                                                              | 0.0068 | hayabusa (hashtag for Hayabusa's return)                                 | 37                        |
| 7  | iOgd (a part of Ustream URL where Hyabusa's return was live broadcasted)              | 0.0067 | 大陸 (a subpart of a TV program's name)                                    | 35                        |
| 8  | 今日 (today)                                                                            | 0.0066 | 情熱 (a subpart of a TV program's name)                                    | 30                        |
| 9  | hayabusa (hashtag for Hayabusa's return)                                              | 0.0055 | ustream (a website for live video streaming of events online)            | 26                        |
| 10 | そう (a subpart of terms)                                                               | 0.0052 | 拍手 (clapping)                                                            | 24                        |
