# Supplementary material for: Quantifying Collective Attention from Tweet Stream
Source: PLOS journal article supplement (doi:10.1371/journal.pone.0061823), 2013-04-30
Supplement: S4 (10.1371/journal.pone.0061823.s004) [file journal.pone.0061823.s004]

Table S 1: **Collective attention in 2010.**

| Date       | JS    | Content                                                   | Category          |
|------------|-------|-----------------------------------------------------------|-------------------|
| 2010/1/1   | 0.032 | New Year and holiday (New year greetings and resolutions) | Annual events     |
| 2010/1/2   | 0.006 | New Year and holiday                                      | Annual events     |
|            |       | Hakone Ekiden: First half                                 | Sporting events   |
| 2010/1/9   | 0.010 | All-Japan high school soccer tournament                   | Sporting events   |
| 2010/1/20  | 0.018 | Twitter outage                                            | Twitter outage    |
| 2010/1/28  | 0.010 | Introduction of iPad                                      | Technology        |
| 2010/2/13  | 0.006 | Opening ceremony of the Vancouver Olympics                | Sporting events   |
| 2010/2/26  | 0.006 | Women's figure skating at the Olympics                    | Sporting events   |
| 2010/3/14  | 0.005 | Earthquake (M6.6)                                         | Natural disasters |
| 2010/3/18  | 0.005 | Twitter outage                                            | Twitter outage    |
| 2010/3/21  | 0.005 | Rainstorm                                                 | Natural disasters |
| 2010/3/28  | 0.006 | IT-related event                                          | Technology        |
| 2010/4/5   | 0.006 | Twitter outage                                            | Twitter outage    |
| 2010/5/30  | 0.007 | International friendship football: England beat Japan     | Sporting events   |
| 2010/6/10  | 0.006 | Release of a new hamburger                                | Culture           |
| 2010/6/13  | 0.016 | Earthquake (M6.2)                                         | Natural disasters |
|            |       | Twitter outage                                            | Twitter outage    |
|            |       | Hayabusa's return to the Earth                            | Science           |
| 2010/6/14  | 0.010 | FIFA World Cup: Japan beat Cameroon                       | Sporting events   |
| 2010/6/15  | 0.042 | Same as above                                             | Sporting events   |
|            |       | Twitter outage                                            | Twitter outage    |
| 2010/6/19  | 0.011 | FIFA World Cup: Netherlands beat Japan                    | Sporting events   |
| 2010/6/25  | 0.117 | FIFA World Cup: Japan beat Denmark                        | Sporting events   |
| 2010/6/27  | 0.008 | FIFA World Cup: Germany beat England                      | Sporting events   |
| 2010/6/28  | 0.005 | Same as above                                             | Sporting events   |
| 2010/6/29  | 0.010 | FIFA World Cup: Paraguay beat Japan                       | Sporting events   |
| 2010/6/30  | 0.064 | Same as above                                             | Sporting events   |
| 2010/7/3   | 0.008 | FIFA World Cup: Quarter finals                            | Sporting events   |
| 2010/7/4   | 0.011 | Same as above                                             | Sporting events   |
| 2010/7/8   | 0.012 | FIFA World Cup: Spain beat Germany in the semifinals      | Sporting events   |
| 2010/7/11  | 0.005 | Early report of the 22nd Upper House election             | Politics          |
| 2010/7/12  | 0.030 | FIFA World Cup: Spain beat Netherlands to win the cup     | Sporting events   |
| 2010/8/1   | 0.032 | Twitter outage                                            | Twitter outage    |
| 2010/8/6   | 0.011 | Twitter outage                                            | Twitter outage    |
| 2010/10/8  | 0.005 | International friendship football: Japan beat Argentina   | Sporting events   |
|            |       | Animation movie "Lupin III: Castle of Cagliostro"         | Culture           |
| 2010/11/7  | 0.006 | Final game of the Japanese baseball championship          | Sporting events   |
| 2010/12/26 | 0.015 | M-1 Grand Prix, an annual comedy contest                  | Culture           |
| 2010/12/31 | 0.012 | New Year's Eve                                            | Annual events     |
